# Supplementary material for: Increased expression of HIF2α during iron deficiency–associated megakaryocytic differentiation
Source: PubMed Central journal article supplement (PMC4949661; doi:10.1111/jth.12884), 2015-04-23
Supplement: JTH-13-1113-s002.pdf [file JTH-13-1113-s002.pdf]

**SUPPLEMENTARY FIGURES**

**Supplementary table 1.  $\Delta\Delta Ct$  of all investigated targets on qPCR Arrays.**

**Upregulated** **Downregulated** **Not expressed**

|                   | GROUP                             | GENE NAME     | $\Delta\Delta Ct$ |      |      |                                                                                                          |
|-------------------|-----------------------------------|---------------|-------------------|------|------|----------------------------------------------------------------------------------------------------------|
|                   |                                   |               | HEL               | CMK  | MEG  |                                                                                                          |
| Regulated Targets | Iron Homeostasis                  | TFR1          | 2.17              | 1.67 | 1.84 | transferrin receptor (p90, CD71)                                                                         |
|                   | Iron Homeostasis                  | FTH           | 2.89              | 0.98 | 0.90 | ferritin, heavy polypeptide 1                                                                            |
|                   | Iron Homeostasis                  | HO-1          | 0.61              | 0.89 | 2.10 | heme oxygenase (decycling) 1                                                                             |
|                   | HIF/VEGF                          | HIF2 $\alpha$ | 2.25              | 1.13 | 2.03 | endothelial PAS domain protein 1                                                                         |
|                   | HIF/VEGF                          | VEGFR1        | 2.24              | 1.19 | 1.75 | fms-related tyrosine kinase 1 (vascular endothelial growth factor/vascular permeability factor receptor) |
|                   | HIF/VEGF                          | VEGFR2        | 0.61              | 1.18 | 2.13 | kinase insert domain receptor (a type III receptor tyrosine kinase)                                      |
|                   | Hematopoiesis and Differentiation | HBB           | 0.48              | 1.06 | 0.94 | hemoglobin, beta                                                                                         |
|                   | Hematopoiesis and Differentiation | VWF           | 0.24              | 1.80 | 0.98 | von Willebrand factor                                                                                    |
|                   | Hematopoiesis and Differentiation | CD61          | 0.49              | 1.51 | 1.13 | integrin, beta 3 (platelet glycoprotein IIIa, antigen CD61)                                              |
|                   | Hematopoiesis and Differentiation | PPBP          | 0.14              | 1.30 | 1.12 | pro-platelet basic protein (chemokine (C-X-C motif) ligand 7)                                            |
|                   | Hematopoiesis and Differentiation | PF4           | 0.16              | 1.02 | 1.08 | platelet factor 4                                                                                        |
|                   | Hematopoiesis and Differentiation | CXCR4         | 0.30              | 1.46 | 1.25 | chemokine (C-X-C motif) receptor 4                                                                       |
|                   | Hematopoiesis and Differentiation | ELF-1         | 6.70              | 1.19 |      | ephrin-A2                                                                                                |
|                   | Cell Cycle/Apoptosis              | CCND1         | 7.17              | 0.79 | 0.95 | cyclin D1                                                                                                |
|                   | Cell Cycle/Apoptosis              | BCL2          | 2.41              | 0.89 | 0.91 | B-cell CLL/lymphoma 2                                                                                    |
|                   | Transcription Factors             | GATA6         | 10.14             | 1.03 |      | GATA binding protein 6                                                                                   |
|                   | Transcription Factors             | AR            | 5.14              | 0.98 | 0.90 | androgen receptor                                                                                        |
|                   | Transcription Factors             | ATF3          | 2.49              | 0.72 | 0.63 | activating transcription factor 3                                                                        |
|                   | Transcription Factors             | FOS           | 0.26              | 0.84 | 0.75 | v-fos FBJ murine osteosarcoma viral oncogene homolog                                                     |
|                   | Transcription Factors             | FOXO1         | 5.66              | 1.46 | 1.01 | forkhead box O1                                                                                          |
|                   | Transcription Factors             | FOXA2         | 6.10              |      | 0.96 | forkhead box A2                                                                                          |
|                   | Transcription Factors             | SMAD9         | 6.78              |      | 0.79 | SMAD family member 9                                                                                     |
|                   | Transcription Factors             | SMAD1         | 9.17              | 1.07 | 1.06 | SMAD family member 1                                                                                     |
|                   | Transcription                     | TGIF1         | 4.82              | 1.11 | 0.86 | TGFB-induced factor homeobox 1                                                                           |

|                                          |                         |                 |      |      |                                       |                                                                                     |
|------------------------------------------|-------------------------|-----------------|------|------|---------------------------------------|-------------------------------------------------------------------------------------|
| <b>Non-regulated Targets</b>             | <b>Factors</b>          |                 |      |      |                                       |                                                                                     |
|                                          | <b>Iron Homeostasis</b> | <b>FTMT</b>     |      |      | 1.07                                  | ferritin mitochondrial                                                              |
|                                          | <b>Iron Homeostasis</b> | <b>SLC11A1</b>  |      |      | 1.07                                  | solute carrier family 11 (proton-coupled divalent metal ion transporters), member 1 |
|                                          | <b>Iron Homeostasis</b> | <b>HAMP</b>     | 1.09 | 1.13 |                                       | hepcidin antimicrobial peptide                                                      |
|                                          | <b>Iron Homeostasis</b> | <b>TWSG1</b>    | 1.14 | 0.96 | 1.09                                  | twisted gastrulation homolog 1 (Drosophila)                                         |
|                                          | <b>Iron Homeostasis</b> | <b>FECH</b>     | 1.19 | 1.14 | 1.12                                  | ferrochelatase                                                                      |
|                                          | <b>Iron Homeostasis</b> | <b>ALAS1</b>    | 1.21 | 1.15 | 1.20                                  | aminolevulinic acid, delta-, synthase 1                                             |
|                                          | <b>Iron Homeostasis</b> | <b>TFR2</b>     | 1.22 | 1.26 | 1.24                                  | transferrin receptor 2                                                              |
|                                          | <b>Iron Homeostasis</b> | <b>ALAS2</b>    | 1.23 | 1.43 | 1.07                                  | aminolevulinic acid, delta-, synthase 2                                             |
|                                          | <b>Iron Homeostasis</b> | <b>FXN</b>      | 1.43 | 0.91 | 0.89                                  | frataxin                                                                            |
|                                          | <b>Iron Homeostasis</b> | <b>ABCB7</b>    | 1.67 | 1.05 | 1.15                                  | ATP-binding cassette, sub-family B (MDR/TAP), member 7                              |
|                                          | <b>Iron Homeostasis</b> | <b>HMOX2</b>    | 1.69 | 0.90 | 1.11                                  | heme oxygenase (decycling) 2                                                        |
|                                          | <b>Iron Homeostasis</b> | <b>FLVCR1</b>   | 1.74 | 0.91 | 1.16                                  | feline leukemia virus subgroup C cellular receptor 1                                |
|                                          | <b>Iron Homeostasis</b> | <b>HSD3B1</b>   |      |      |                                       | hydroxy-delta-5-steroid dehydrogenase, 3 beta- and steroid delta-isomerase 1        |
|                                          | <b>Iron Homeostasis</b> | <b>SCARA 5</b>  |      |      |                                       | scavenger receptor class A, member 5 (putative)                                     |
|                                          | <b>Iron Homeostasis</b> | <b>ACO1</b>     | 0.90 | 0.89 | 1.13                                  | aconitase 1, soluble                                                                |
|                                          | <b>Iron Homeostasis</b> | <b>BACH1</b>    | 0.81 | 1.19 | 1.27                                  | BTB and CNC homology 1, basic leucine zipper transcription factor 1                 |
|                                          | <b>Iron Homeostasis</b> | <b>BMP6</b>     | 0.80 | 0.94 | 1.38                                  | bone morphogenetic protein 6                                                        |
|                                          | <b>Iron Homeostasis</b> | <b>EIF2AK1</b>  | 1.50 | 1.14 | 1.09                                  | eukaryotic translation initiation factor 2-alpha kinase 1                           |
|                                          | <b>Iron Homeostasis</b> | <b>FTL</b>      | 1.03 | 1.15 | 1.09                                  | ferritin, light polypeptide                                                         |
|                                          | <b>Iron Homeostasis</b> | <b>GDF15</b>    | 1.19 | 1.06 | 1.16                                  | growth differentiation factor 15                                                    |
|                                          | <b>Iron Homeostasis</b> | <b>IREB2</b>    | 1.06 | 0.95 | 1.20                                  | iron-responsive element binding protein 2                                           |
|                                          | <b>Iron Homeostasis</b> | <b>NRF1</b>     | 1.00 | 1.07 | 1.23                                  | nuclear respiratory factor 1                                                        |
|                                          | <b>Iron Homeostasis</b> | <b>SLC22A17</b> | 0.81 | 1.33 | 0.94                                  | solute carrier family 22, member 17                                                 |
|                                          | <b>Iron Homeostasis</b> | <b>SLC25A37</b> | 1.06 | 1.27 | 1.09                                  | solute carrier family 25, member 37                                                 |
|                                          | <b>Iron Homeostasis</b> | <b>SLC40A1</b>  | 1.18 | 1.69 | 1.34                                  | solute carrier family 40 (iron-regulated transporter), member 1                     |
|                                          | <b>HIF/VEGF</b>         | <b>VEGFA</b>    | 1.41 | 1.17 | 1.25                                  | vascular endothelial growth factor A                                                |
|                                          | <b>HIF/VEGF</b>         | <b>VEGFB</b>    | 1.63 | 1.10 | 1.10                                  | vascular endothelial growth factor B                                                |
|                                          | <b>Oxidative stress</b> | <b>NOS2</b>     | 0.67 | 0.94 | 1.07                                  | nitric oxide synthase 2, inducible                                                  |
|                                          | <b>Oxidative stress</b> | <b>CAT</b>      | 1.33 | 1.04 | 1.12                                  | catalase                                                                            |
|                                          | <b>Oxidative stress</b> | <b>GPX4</b>     | 1.26 | 1.13 | 1.24                                  | glutathione peroxidase 4 (phospholipid hydroperoxidase)                             |
|                                          | <b>Oxidative stress</b> | <b>SOD1</b>     | 1.00 | 0.90 | 0.96                                  | superoxide dismutase 1, soluble                                                     |
| <b>Oxidative stress</b>                  | <b>SOD2</b>             | 1.04            | 1.15 | 1.15 | superoxide dismutase 2, mitochondrial |                                                                                     |
| <b>Hematopoiesis and Differentiation</b> | <b>GP6</b>              | 0.53            | 1.03 | 1.07 | glycoprotein VI (platelet)            |                                                                                     |
| <b>Hematopoiesis and Differentiation</b> | <b>GPX1</b>             | 0.55            | 1.23 | 0.89 | glutathione peroxidase 1              |                                                                                     |
| <b>Hematopoiesis and Differentiation</b> | <b>CD34</b>             | 0.57            | 1.13 | 1.45 | CD34 molecule                         |                                                                                     |
| <b>Hematopoiesis</b>                     | <b>TUBB1</b>            | 0.60            | 1.68 | 1.21 | tubulin, beta 1                       |                                                                                     |

|  |                                          |               |      |      |      |                                                                                  |
|--|------------------------------------------|---------------|------|------|------|----------------------------------------------------------------------------------|
|  | <b>and Differentiation</b>               |               |      |      |      |                                                                                  |
|  | <b>Hematopoiesis and Differentiation</b> | <b>CD41</b>   | 0.63 | 1.10 | 1.02 | integrin, alpha 2b (platelet glycoprotein IIb of IIb/IIIa complex, antigen CD41) |
|  | <b>Hematopoiesis and Differentiation</b> | <b>GP5</b>    | 0.65 | 1.12 | 1.14 | glycoprotein V (platelet)                                                        |
|  | <b>Hematopoiesis and Differentiation</b> | <b>CD42b</b>  | 0.72 | 1.03 | 0.96 | glycoprotein Ib (platelet), alpha polypeptide                                    |
|  | <b>Hematopoiesis and Differentiation</b> | <b>S1PR4</b>  | 0.73 | 1.07 | 0.92 | sphingosine-1-phosphate receptor 4                                               |
|  | <b>Hematopoiesis and Differentiation</b> | <b>CD36</b>   | 0.74 | 1.32 | 1.32 | CD36 molecule (thrombospondin receptor)                                          |
|  | <b>Hematopoiesis and Differentiation</b> | <b>MPL</b>    | 0.75 | 1.36 | 1.23 | myeloproliferative leukemia virus oncogene                                       |
|  | <b>Hematopoiesis and Differentiation</b> | <b>EPOR</b>   | 0.84 | 1.41 | 0.97 | erythropoietin receptor                                                          |
|  | <b>Hematopoiesis and Differentiation</b> | <b>CXCL12</b> | 0.97 |      | 1.17 | chemokine (C-X-C motif) ligand 12                                                |
|  | <b>Hematopoiesis and Differentiation</b> | <b>EPO</b>    | 1.09 | 1.13 |      | erythropoietin                                                                   |
|  | <b>Hematopoiesis and Differentiation</b> | <b>GYPA</b>   | 1.42 | 1.40 | 0.97 | glycophorin A (MNS blood group)                                                  |
|  | <b>Hematopoiesis and Differentiation</b> | <b>THPO</b>   | 1.96 | 1.01 |      | thrombopoietin                                                                   |
|  | <b>Hematopoiesis and Differentiation</b> | <b>JAK2</b>   | 0.82 | 1.21 | 1.29 | Janus kinase 2                                                                   |
|  | <b>Hematopoiesis and Differentiation</b> | <b>KIT</b>    | 0.88 | 0.94 | 0.99 | v-kit Hardy-Zuckerman 4 feline sarcoma viral oncogene homolog                    |
|  | <b>Hematopoiesis and Differentiation</b> | <b>KITLG</b>  | 1.65 | 1.02 | 0.74 | KIT ligand                                                                       |
|  | <b>Hematopoiesis and Differentiation</b> | <b>SPI1</b>   | 0.92 | 1.20 | 1.08 | spleen focus forming virus (SFFV) proviral integration oncogene spi1             |
|  | <b>Hematopoiesis and Differentiation</b> | <b>TYK2</b>   | 1.17 | 1.11 | 1.01 | tyrosine kinase 2                                                                |
|  | <b>Cell Cycle/Apoptosis</b>              | <b>CDKN2A</b> |      |      | 1.28 | cyclin-dependent kinase inhibitor 2A (melanoma, p16, inhibits CDK4)              |
|  | <b>Cell Cycle/Apoptosis</b>              | <b>BCL2L1</b> | 0.75 | 1.19 | 1.21 | BCL2-like 1                                                                      |
|  | <b>Cell Cycle/Apoptosis</b>              | <b>BAX</b>    | 1.01 | 1.05 | 1.17 | BCL2-associated X protein                                                        |
|  | <b>Cell Cycle/Apoptosis</b>              | <b>CCND3</b>  | 1.02 | 1.10 | 0.98 | cyclin D3                                                                        |
|  | <b>Cell Cycle/Apoptosis</b>              | <b>CDC6</b>   | 1.21 | 0.90 | 1.11 | cell division cycle 6 homolog (S. cerevisiae)                                    |
|  | <b>Cell Cycle/Apoptosis</b>              | <b>CDKN1A</b> | 1.72 | 1.49 | 1.34 | cyclin-dependent kinase inhibitor 1A (p21, Cip1)                                 |
|  | <b>Cell Cycle/Apoptosis</b>              | <b>CCNE1</b>  | 1.78 | 0.99 | 1.24 | cyclin E1                                                                        |
|  | <b>Cell Cycle/Apoptosis</b>              | <b>CCNB1</b>  | 1.40 | 0.92 | 1.20 | cyclin B1                                                                        |
|  | <b>Cell Cycle/Apoptosis</b>              | <b>CDK1</b>   | 1.38 | 1.01 | 0.97 | cyclin-dependent kinase 1                                                        |
|  | <b>Cell Cycle/Apoptosis</b>              | <b>CDK2</b>   | 1.19 | 1.09 | 1.14 | cyclin-dependent kinase 2                                                        |
|  | <b>Cell</b>                              | <b>CDKN1B</b> | 1.08 | 1.21 | 1.07 | cyclin-dependent kinase inhibitor 1B                                             |

|  |                              |               |      |      |      |                                                                         |
|--|------------------------------|---------------|------|------|------|-------------------------------------------------------------------------|
|  | <b>Cycle/Apoptosis</b>       |               |      |      |      | (p27, Kip1)                                                             |
|  | <b>Cell Cycle/Apoptosis</b>  | <b>MCM2</b>   | 0.86 | 0.91 | 1.09 | minichromosome maintenance complex component 2                          |
|  | <b>Transcription Factors</b> | <b>MEIS1</b>  | 0.63 | 1.19 | 1.20 | Meis homeobox 1                                                         |
|  | <b>Transcription Factors</b> | <b>HOXA9</b>  | 0.70 | 0.83 | 0.78 | homeobox A9;HOXA10-HOXA9 readthrough                                    |
|  | <b>Transcription Factors</b> | <b>FOXO3</b>  | 0.89 | 1.19 | 1.26 | forkhead box O3;forkhead box O3B pseudogene                             |
|  | <b>Transcription Factors</b> | <b>HOXA11</b> | 0.90 | 0.82 | 1.07 | homeobox A11                                                            |
|  | <b>Transcription Factors</b> | <b>CBFB</b>   | 1.43 | 0.99 | 1.19 | core-binding factor, beta subunit                                       |
|  | <b>Transcription Factors</b> | <b>ELK4</b>   | 0.97 | 0.95 | 0.92 | ELK4, ETS-domain protein (SRF accessory protein 1)                      |
|  | <b>Transcription Factors</b> | <b>FLI1</b>   | 0.70 | 1.12 | 1.05 | Friend leukemia virus integration 1                                     |
|  | <b>Transcription Factors</b> | <b>GABPA</b>  | 1.17 | 1.03 | 1.15 | GA binding protein transcription factor, alpha subunit 60kDa            |
|  | <b>Transcription Factors</b> | <b>HOXB4</b>  | 1.45 | 1.06 | 0.89 | homeobox B4                                                             |
|  | <b>Transcription Factors</b> | <b>NFE2</b>   | 0.92 | 1.21 | 1.20 | nuclear factor (erythroid-derived 2), 45kDa                             |
|  | <b>Transcription Factors</b> | <b>NFE2L3</b> | 0.73 | 0.89 | 1.20 | nuclear factor (erythroid-derived 2)-like 3                             |
|  | <b>Transcription Factors</b> | <b>RAB27B</b> | 0.71 | 0.85 | 1.10 | RAB27B, member RAS oncogene family                                      |
|  | <b>Transcription Factors</b> | <b>RUNX1</b>  | 0.76 | 1.12 | 1.12 | runt-related transcription factor 1                                     |
|  | <b>Transcription Factors</b> | <b>TAL1</b>   | 0.71 | 1.04 | 1.21 | T-cell acute lymphocytic leukemia 1                                     |
|  | <b>Transcription Factors</b> | <b>ZFPM1</b>  | 0.78 | 1.29 | 1.10 | zinc finger protein, multitype 1                                        |
|  | <b>Transcription Factors</b> | <b>ARNT</b>   | 0.88 | 1.12 | 1.02 | aryl hydrocarbon receptor nuclear translocator                          |
|  | <b>Transcription Factors</b> | <b>ATF1</b>   | 0.88 | 0.88 | 1.14 | activating transcription factor 1                                       |
|  | <b>Transcription Factors</b> | <b>ATF2</b>   | 0.75 | 1.03 | 1.14 | activating transcription factor 2                                       |
|  | <b>Transcription Factors</b> | <b>ATF4</b>   | 0.72 | 0.97 | 1.24 | activating transcription factor 4 (tax-responsive enhancer element B67) |
|  | <b>Transcription Factors</b> | <b>B2M</b>    | 0.59 | 1.31 | 0.94 | beta-2-microglobulin                                                    |
|  | <b>Transcription Factors</b> | <b>CEBPA</b>  | 0.98 | 0.89 | 1.19 | CCAAT/enhancer binding protein (C/EBP), alpha                           |
|  | <b>Transcription Factors</b> | <b>CEBPB</b>  | 1.23 | 0.98 | 1.13 | CCAAT/enhancer binding protein (C/EBP), beta                            |
|  | <b>Transcription Factors</b> | <b>CEBPG</b>  | 1.14 | 0.93 | 1.28 | CCAAT/enhancer binding protein (C/EBP), gamma                           |
|  | <b>Transcription Factors</b> | <b>CREB1</b>  | 0.74 | 1.30 | 1.00 | cAMP responsive element binding protein 1                               |
|  | <b>Transcription Factors</b> | <b>CREBBP</b> | 0.83 | 1.29 | 0.96 | CREB binding protein                                                    |
|  | <b>Transcription Factors</b> | <b>CTNNB1</b> | 0.76 | 1.09 | 1.32 | catenin (cadherin-associated protein), beta 1, 88kDa                    |

|                       |        |      |      |      |                                                                                         |
|-----------------------|--------|------|------|------|-----------------------------------------------------------------------------------------|
| Transcription Factors | DR1    | 0.78 | 0.96 | 1.03 | down-regulator of transcription 1, TBP-binding (negative cofactor 2)                    |
| Transcription Factors | E2F1   | 0.77 | 0.99 | 0.82 | E2F transcription factor 1                                                              |
| Transcription Factors | E2F6   | 0.86 | 0.98 | 1.01 | E2F transcription factor 6                                                              |
| Transcription Factors | EGR1   | 0.60 | 1.03 | 0.68 | early growth response 1                                                                 |
| Transcription Factors | ELK1   | 1.13 | 1.15 | 1.05 | ELK1, member of ETS oncogene family                                                     |
| Transcription Factors | ESR1   |      |      |      | estrogen receptor 1                                                                     |
| Transcription Factors | ETS1   | 0.55 | 1.14 | 1.41 | v-ets erythroblastosis virus E26 oncogene homolog 1 (avian)                             |
| Transcription Factors | ETS2   | 0.57 | 1.25 | 1.06 | v-ets erythroblastosis virus E26 oncogene homolog 2 (avian)                             |
| Transcription Factors | GATA1  | 0.69 | 1.17 | 0.99 | GATA binding protein 1 (globin transcription factor 1)                                  |
| Transcription Factors | GATA2  | 0.65 | 1.06 | 1.13 | GATA binding protein 2                                                                  |
| Transcription Factors | GATA3  | 0.70 | 0.87 | 1.12 | GATA binding protein 3                                                                  |
| Transcription Factors | GTF2B  | 0.77 | 1.20 | 1.02 | general transcription factor IIB                                                        |
| Transcription Factors | GTF2F1 | 0.84 | 0.94 | 0.94 | general transcription factor IIF, polypeptide 1, 74kDa                                  |
| Transcription Factors | GUSB   | 1.30 | 1.06 | 1.19 | glucuronidase, beta                                                                     |
| Transcription Factors | HAND1  |      |      | 0.96 | heart and neural crest derivatives expressed 1                                          |
| Transcription Factors | HAND2  |      |      |      | heart and neural crest derivatives expressed 2                                          |
| Transcription Factors | HDAC1  | 0.82 | 0.98 | 1.54 | histone deacetylase 1                                                                   |
| Transcription Factors | HIF1A  | 0.71 | 1.15 | 1.57 | hypoxia inducible factor 1, alpha subunit (basic helix-loop-helix transcription factor) |
| Transcription Factors | HMBS   | 0.77 | 1.00 | 0.98 | hydroxymethylbilane synthase                                                            |
| Transcription Factors | HNF1A  |      |      |      | HNF1 homeobox A                                                                         |
| Transcription Factors | HNF4A  | 0.82 | 1.36 | 0.59 | hepatocyte nuclear factor 4, alpha                                                      |
| Transcription Factors | HOXA5  | 0.63 | 1.05 | 1.97 | homeobox A5                                                                             |
| Transcription Factors | HSF1   | 0.77 | 0.90 | 0.94 | heat shock transcription factor 1                                                       |
| Transcription Factors | ID1    | 0.58 | 1.02 | 1.40 | inhibitor of DNA binding 1, dominant negative helix-loop-helix protein                  |
| Transcription Factors | IRF1   | 0.58 | 1.28 | 0.89 | interferon regulatory factor 1                                                          |
| Transcription Factors | JUN    | 1.40 | 0.70 | 0.75 | jun oncogene                                                                            |
| Transcription Factors | JUNB   | 0.61 | 0.82 | 0.82 | jun B proto-oncogene                                                                    |

|                       |         |      |      |      |                                                                           |
|-----------------------|---------|------|------|------|---------------------------------------------------------------------------|
| Transcription Factors | JUND    |      |      |      | jun D proto-oncogene                                                      |
| Transcription Factors | MAX     | 0.79 | 1.33 | 0.97 | MYC associated factor X                                                   |
| Transcription Factors | MEF2A   | 0.67 | 1.30 | 0.93 | myocyte enhancer factor 2A                                                |
| Transcription Factors | MEF2B   | 1.07 | 1.01 | 1.17 | myocyte enhancer factor 2B                                                |
| Transcription Factors | MEF2C   | 0.58 | 1.25 | 1.47 | myocyte enhancer factor 2C                                                |
| Transcription Factors | MYB     | 0.90 | 1.13 | 1.11 | v-myb myeloblastosis viral oncogene homolog (avian)                       |
| Transcription Factors | MYC     | 0.79 | 1.20 | 1.05 | v-myc myelocytomatosis viral oncogene homolog (avian)                     |
| Transcription Factors | MYF5    |      |      |      | myogenic factor 5                                                         |
| Transcription Factors | MYOD1   |      |      |      | myogenic differentiation 1                                                |
| Transcription Factors | NFAT5   | 1.10 | 1.19 | 0.99 | nuclear factor of activated T-cells 5, tonicity-responsive                |
| Transcription Factors | NFATC1  | 1.35 | 1.09 | 1.01 | nuclear factor of activated T-cells, cytoplasmic, calcineurin-dependent 1 |
| Transcription Factors | NFATC2  | 0.74 | 1.06 | 1.02 | nuclear factor of activated T-cells, cytoplasmic, calcineurin-dependent 2 |
| Transcription Factors | NFATC3  | 0.86 | 1.05 | 1.02 | nuclear factor of activated T-cells, cytoplasmic, calcineurin-dependent 3 |
| Transcription Factors | NFATC4  | 0.64 | 1.16 | 0.91 | nuclear factor of activated T-cells, cytoplasmic, calcineurin-dependent 4 |
| Transcription Factors | NFKB1   | 0.84 | 0.97 | 0.95 | nuclear factor of kappa light polypeptide gene enhancer in B-cells 1      |
| Transcription Factors | NFYB    | 0.84 | 0.97 | 1.04 | nuclear transcription factor Y, beta                                      |
| Transcription Factors | NR3C1   | 1.34 | 1.26 | 1.06 | nuclear receptor subfamily 3, group C, member 1 (glucocorticoid receptor) |
| Transcription Factors | PAX6    | 0.97 | 1.09 |      | paired box 6                                                              |
| Transcription Factors | PGK1    | 0.99 | 1.00 | 1.05 | phosphoglycerate kinase 1                                                 |
| Transcription Factors | POU2AF1 |      |      |      | POU class 2 associating factor 1                                          |
| Transcription Factors | PPARA   | 0.57 | 1.09 | 1.15 | peroxisome proliferator-activated receptor alpha                          |
| Transcription Factors | PPARG   |      |      | 0.89 | peroxisome proliferator-activated receptor gamma                          |
| Transcription Factors | PPIA    | 1.03 | 0.83 | 0.96 | peptidylprolyl isomerase A (cyclophilin A)                                |
| Transcription Factors | RB1     | 0.72 | 1.21 | 0.95 | retinoblastoma 1                                                          |
| Transcription Factors | REL     | 0.94 | 0.97 | 1.09 | v-rel reticuloendotheliosis viral oncogene homolog (avian)                |
| Transcription Factors | RELA    | 0.86 | 0.99 | 0.93 | v-rel reticuloendotheliosis viral oncogene homolog A (avian)              |
| Transcription Factors | RELB    | 0.91 | 1.16 | 0.77 | v-rel reticuloendotheliosis viral oncogene homolog B                      |

|                              |                 |      |      |      |                                                                                  |
|------------------------------|-----------------|------|------|------|----------------------------------------------------------------------------------|
| <b>Transcription Factors</b> | <b>RPLP0</b>    | 0.84 | 1.02 | 1.08 | ribosomal protein, large, P0                                                     |
| <b>Transcription Factors</b> | <b>SMAD4</b>    | 0.88 | 1.16 | 1.16 | SMAD family member 4                                                             |
| <b>Transcription Factors</b> | <b>SMAD5</b>    | 0.93 | 1.01 | 0.96 | SMAD family member 5                                                             |
| <b>Transcription Factors</b> | <b>SP1</b>      | 0.86 | 1.17 | 1.04 | Sp1 transcription factor                                                         |
| <b>Transcription Factors</b> | <b>SP3</b>      | 0.90 | 1.09 | 1.28 | Sp3 transcription factor                                                         |
| <b>Transcription Factors</b> | <b>STAT1</b>    | 0.72 | 1.11 | 1.01 | signal transducer and activator of transcription 1, 91kDa                        |
| <b>Transcription Factors</b> | <b>STAT2</b>    | 0.72 | 1.00 | 0.94 | signal transducer and activator of transcription 2, 113kDa                       |
| <b>Transcription Factors</b> | <b>STAT3</b>    | 0.64 | 1.26 | 0.96 | signal transducer and activator of transcription 3 (acute-phase response factor) |
| <b>Transcription Factors</b> | <b>STAT4</b>    | 0.60 | 0.74 | 0.93 | signal transducer and activator of transcription 4                               |
| <b>Transcription Factors</b> | <b>STAT5A</b>   | 0.96 | 0.94 | 0.97 | signal transducer and activator of transcription 5A                              |
| <b>Transcription Factors</b> | <b>STAT5B</b>   | 1.02 | 0.93 | 0.94 | signal transducer and activator of transcription 5B                              |
| <b>Transcription Factors</b> | <b>STAT6</b>    | 0.91 | 1.15 | 1.09 | signal transducer and activator of transcription 6, interleukin-4 induced        |
| <b>Transcription Factors</b> | <b>TBP (A9)</b> | 1.41 | 1.16 | 1.01 | TATA box binding protein                                                         |
| <b>Transcription Factors</b> | <b>TBP (H6)</b> | 0.92 | 1.13 | 1.17 | TATA box binding protein                                                         |
| <b>Transcription Factors</b> | <b>TCF7L2</b>   | 1.23 | 1.40 | 1.05 | transcription factor 7-like 2 (T-cell specific, HMG-box)                         |
| <b>Transcription Factors</b> | <b>TFAP2A</b>   | 1.65 | 1.26 | 1.00 | transcription factor AP-2 alpha (activating enhancer binding protein 2 alpha)    |
| <b>Transcription Factors</b> | <b>TP53</b>     | 0.55 | 0.96 | 0.75 | tumor protein p53                                                                |
| <b>Transcription Factors</b> | <b>UBC</b>      | 0.97 | 1.18 | 1.01 | ubiquitin C                                                                      |
| <b>Transcription Factors</b> | <b>YY1</b>      | 0.96 | 1.09 | 0.61 | YY1 transcription factor                                                         |
